# Supplementary material for: Different toxicities of nanoscale titanium dioxide particles in the roots and leaves of wheat seedlings
Source: PubMed Central journal article supplement — RSC Adv. 2019 Jun 18;9(33):19243–52. doi: 10.1039/c9ra02984b (PMC9065167; doi:10.1039/c9ra02984b), 2019-06-18
Supplement: RA-009-C9RA02984B-s001.pdf [file RA-009-C9RA02984B-s001.pdf]

1 **Supplementary data**

2

3 **Different toxicity of nanoscale titanium dioxide particle in**  
4 **the roots and leaves of wheat seedling**

5 Yanger Chen,\*‡<sup>a</sup> Nan Wu,‡<sup>a</sup> Haotian Mao,‡<sup>a</sup> Jun Zhou,<sup>a</sup> Yanqiu Su,<sup>c</sup> Zhongwei Zhang,<sup>b</sup>

6 Huaiyu Zhang,<sup>a</sup> and Shu Yuan<sup>b</sup>

7

8 <sup>a</sup> *College of Life Science, Sichuan Agricultural University, Ya'an 625014, China. E-mail:*

9 *anty9826@163.com; Tel: +86-835-2886653*

10 <sup>b</sup> *College of Resources, Sichuan Agricultural University, Chengdu 611130, China*

11 <sup>c</sup> *College of Life Science, Sichuan University, Chengdu 610064, China*

12

13 ‡ These authors contributed equally to this work.

14

15 **Supplementary data contents**

16 Supplemental Methods

17 Supplemental Table 1

18 Supplemental Figures 1-10

19 Supplemental References

20

21

## 22 **Supplemental Methods**

### 23 **Measurements of chlorophyll, proline, soluble sugar, and total protein**

24 Chlorophyll contents from fresh wheat leaves were measured by a 80% (v/v) acetone  
25 extraction method at 646 and 663 nm absorbance.<sup>1</sup> Soluble sugar and proline were extracted  
26 from fresh wheat leaves and roots (0.5 g) using an 80% ethanol solution. Soluble sugar was  
27 colorimetrically quantified after reacting with anthrone reagent according to the previous  
28 method using a UV spectrophotometer (Hitachi-U2000, Hitachi, Ltd., Tokyo, Japan).<sup>2</sup> Proline  
29 content in roots and leaves was determined by measuring the absorbance at 520 nm using a  
30 UV spectrophotometer according to the previous method.<sup>3</sup> The total proteins was determined  
31 as described previously using a UV spectrophotometer.<sup>4</sup>

32

### 33 **Measurements of ROS and cell death**

34 Visualization of hydrogen peroxide (H<sub>2</sub>O<sub>2</sub>) and superoxide (O<sub>2</sub><sup>•-</sup>) in the leaves and roots was  
35 performed by 2 g mL<sup>-1</sup> 3,3-diaminobenzidine (DAB) solution for 10 h and 0.5 g mL<sup>-1</sup> nitro  
36 blue tetrazolium (NBT) solution for 2 h, respectively. Stained roots and leaves were washed  
37 in 95% ethanol at 80°C until other color was nearly removed.<sup>5</sup> For quantitative analysis of  
38 ROS, the content of O<sub>2</sub><sup>•-</sup> and H<sub>2</sub>O<sub>2</sub> in wheat roots and leaves was determined according to the  
39 method of Elstner and Heupel and Okuda et al., respectively.<sup>6,7</sup> To visualize the degree of cell  
40 death, wheat roots and leaves after nTiO<sub>2</sub> exposure were submerged in 1.25 mg/mL trypan-  
41 blue solution and then decolorized in chloral hydrate solution as following the method of  
42 Shirasu et al.<sup>8</sup>

43

#### 44 **Measurements of lipid peroxidation and electrolyte leakage**

45 Malonyldialdehyde (MDA) level in wheat roots and leaves was measured using a UV  
46 spectrophotometer following the previous method.<sup>9</sup> Lipid peroxidation was expressed as  
47 thiobarbituric reactive species (TBARS) (extinction coefficient of 155 mM<sup>-1</sup> cm<sup>-1</sup>). Electrolyte  
48 leakage was measured with a conductivity meter (DDSJ-308A, Shanghai Precision  
49 Instruments Co., Ltd., China) according to the method of Chen et al.<sup>9</sup> The relative electrolyte  
50 leakage was calculated as the ratio of the initial conductivity to the absolute conductivity  
51 (boiled at 95°C for 30 min).

52

#### 53 **Measurements of antioxidant enzyme and non-enzymatic antioxidants**

54 The crude extracts for antioxidant enzymes from the roots and leaves were conducted  
55 according to the previous method.<sup>10</sup> The treated roots and leaves were ground with ice-cold  
56 50 mM potassium phosphate buffer (pH 7.8) including 0.2m M EDTA, 2% (w/v) polyvinyl  
57 polypyrrolidone (PPVP) and 2 mM ascorbate. After centrifugation (15 min, 12,000 g), the  
58 supernatant was applied for measurements of enzyme activity. Catalase (CAT), peroxidase  
59 (POD), superoxide dismutase (SOD), ascorbate peroxidase (APX), glutathione peroxidase  
60 (GPX), and glutathione reductase (GR) activities were assayed as previously described.<sup>10</sup> The  
61 assays were performed using a UV spectrophotometer (Hitachi-U2000, Hitachi, Ltd., Tokyo,  
62 Japan).

63 Contents of reduced ascorbic acid/dehydroascorbate (AsA/DHA) were analyzed in extracts

64 according to the method of Kampfenkel et al.<sup>11</sup> The measurement is based on the reduction of  
65 Fe<sup>3+</sup> to Fe<sup>2+</sup> by AsA. Then, Fe<sup>2+</sup> forms complexes with bipyridyl giving a pink color that  
66 absorbs at 525 nm. The contents of AsA and AsA+DHA were calculated using l-ascorbate as  
67 the standard. DHA content was determined using total ascorbate minus AsA. Reduced  
68 glutathione/oxidized glutathione (GSH/GSSG) contents were determined following the  
69 method of Griffith.<sup>12</sup>

70

#### 71 **Gas exchange measurements**

72 Net photosynthetic rate (*P<sub>n</sub>*), stomatal conductance, transpiration rate, and intercellular CO<sub>2</sub>  
73 concentration were measured using the GSF-3000 photosynthesis system (Heinz-Walz  
74 Instruments, Effeltrich, Germany) under 360 μmol mol<sup>-1</sup> CO<sub>2</sub> concentration and illumination  
75 of 1,500 μmol photon m<sup>-2</sup> s<sup>-1</sup> at room temperature according to the previous method.<sup>5</sup> Gas  
76 exchange parameters were calculated as described previously.<sup>13</sup>

77

78

79

80

81

82

83

84

85 **Supplemental Table 1**

86 **Table S1** Seeding growth, germination rate, and the contents of total chlorophyll and proteins

87 in wheat germinated and grown in  $n\text{TiO}_2$  suspension for 14 days.

| $n\text{TiO}_2$<br>Concentration<br>(g L <sup>-1</sup> ) | Root Length<br>(cm) | Seeding Length<br>(cm) | Germination<br>rate (%) | Total<br>Chlorophyll<br>(mg g <sup>-1</sup> FW) | Chlorophyll<br><i>a/b</i> | Total Protein<br>(mg g <sup>-1</sup> FW) |
|----------------------------------------------------------|---------------------|------------------------|-------------------------|-------------------------------------------------|---------------------------|------------------------------------------|
| 0                                                        | 11.92 ± 1.85a       | 13.81 ± 1.32a          | 97.12 ± 5.31a           | 2.53 ± 0.13a                                    | 3.28 ± 0.15a              | 8.53 ± 0.31a                             |
| 0.1                                                      | 10.98 ± 2.21ab      | 12.62 ± 1.95ab         | 95.43 ± 4.17a           | 2.04 ± 0.09ab                                   | 3.12 ± 0.11ab             | 8.04 ± 0.43a                             |
| 0.5                                                      | 10.23 ± 1.56ab      | 12.05 ± 1.48ab         | 94.52 ± 3.85a           | 1.95 ± 0.09b                                    | 3.05 ± 0.07b              | 8.12 ± 0.44a                             |
| 1.0                                                      | 9.54 ± 1.32b        | 11.23 ± 1.63b          | 82.29 ± 4.23b           | 1.95 ± 0.12b                                    | 2.87 ± 0.10bc             | 7.86 ± 0.35ab                            |
| 5.0                                                      | 7.43 ± 1.69c        | 8.56 ± 1.69c           | 71.43 ± 3.75c           | 1.81 ± 0.09c                                    | 2.76 ± 0.015c             | 7.55 ± 0.31b                             |

88 Values are means ± SD from four independent biological replicates. Different letters show a

89 significant difference among these treatments following Duncan's multiplication range test

90 when  $P < 0.05$ .

91

92

93

94

95

96

97

98

99

100 **Supplemental Figures 1-10**

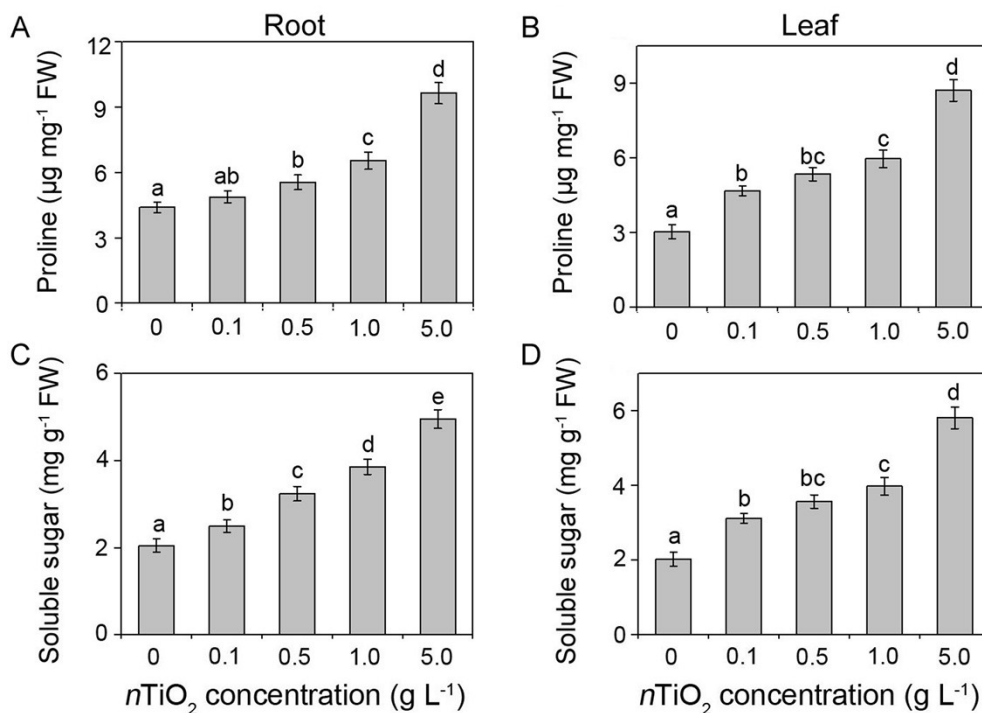

101

102 **Fig. S1** Osmotic regulators in the roots (A and C) and leaves (B and D) of CN19 under  $n\text{TiO}_2$   
103 exposure for 14 days. The data are represented as mean  $\pm$  SD from four independent  
104 repetitions ( $n = 4$ ). The Duncan's multiple range test showed that the values corresponding to  
105 the different letters were significantly different at  $P < 0.05$ .

106

107

108

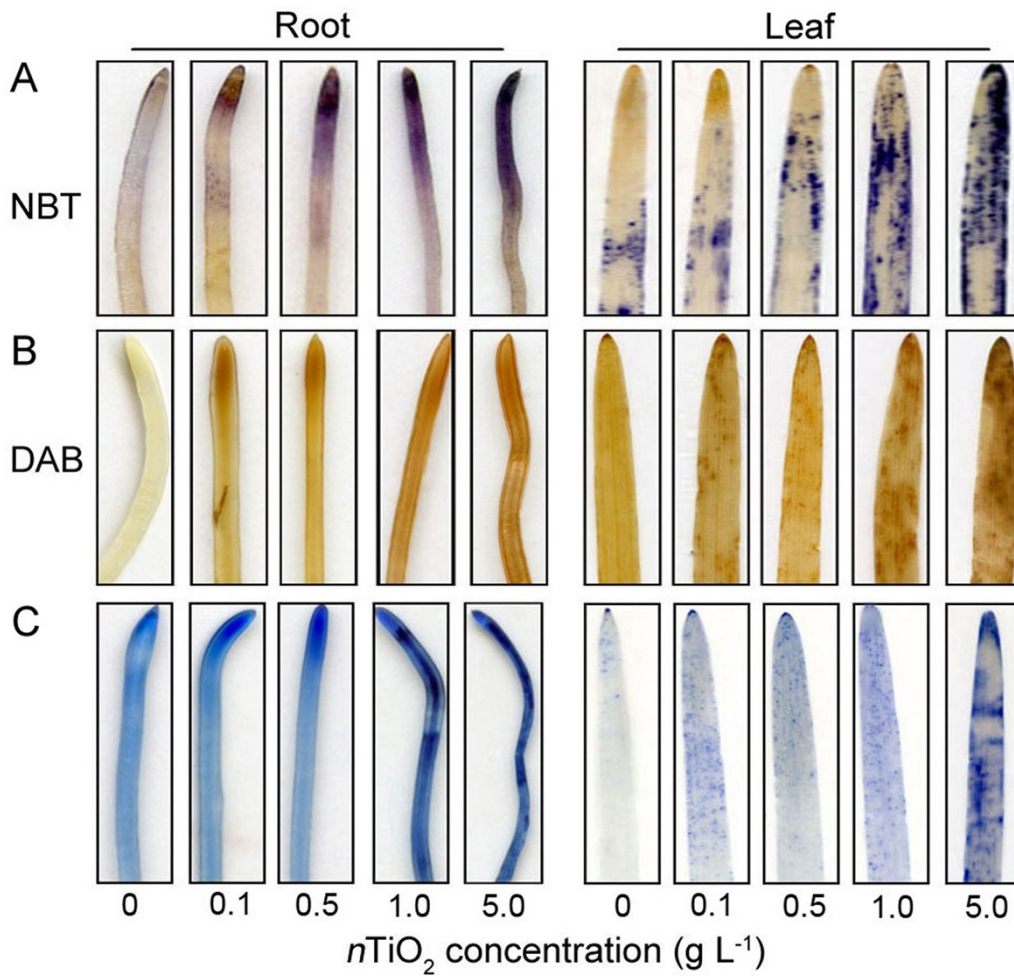

109

110 **Fig. S2** Histochemical assays of ROS and cell death in CN19 under  $n\text{TiO}_2$  exposure for 14  
 111 days. The staining of  $\text{O}_2^{\cdot-}$  and  $\text{H}_2\text{O}_2$  was done by nitro blue tetrazolium (NBT) (A) and 3,3-  
 112 diaminobenzidine (DAB) (B) in the roots and leaves, respectively. Microscopic cell death was  
 113 observed in the roots and leaves by trypan blue staining (C).

114

115

116

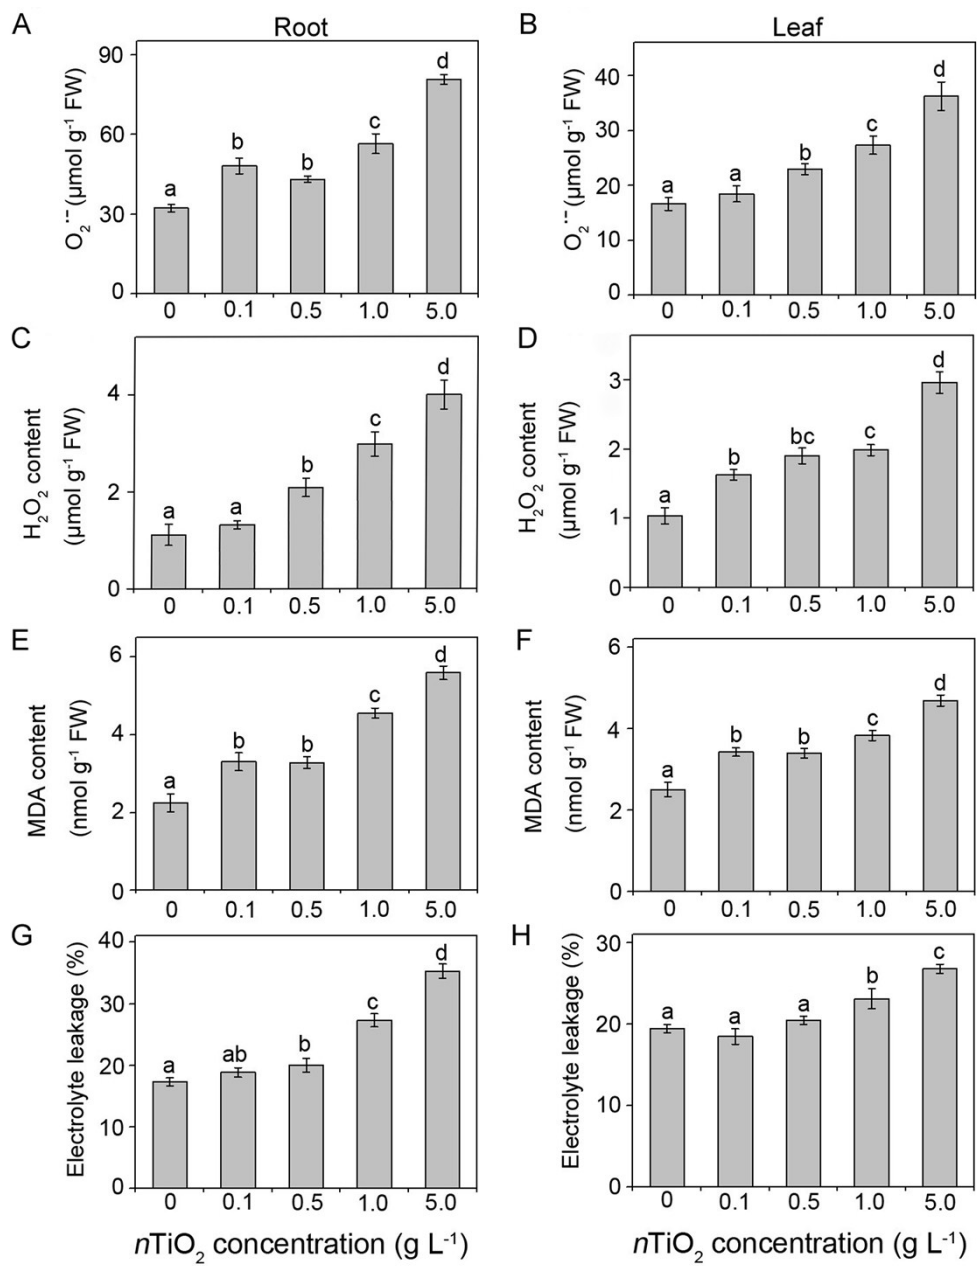

117

118 **Fig. S3** ROS accumulation (A-D) and lipid peroxidation (E-H) in the roots and leaves of  
 119 CN19 under  $n\text{TiO}_2$  exposure for 14 days. The data are represented as mean  $\pm$  SD for four  
 120 independent repetitions ( $n = 4$ ). The Duncan's multiple range test showed that the values  
 121 corresponding to the different letters were significantly different at  $P < 0.05$ .



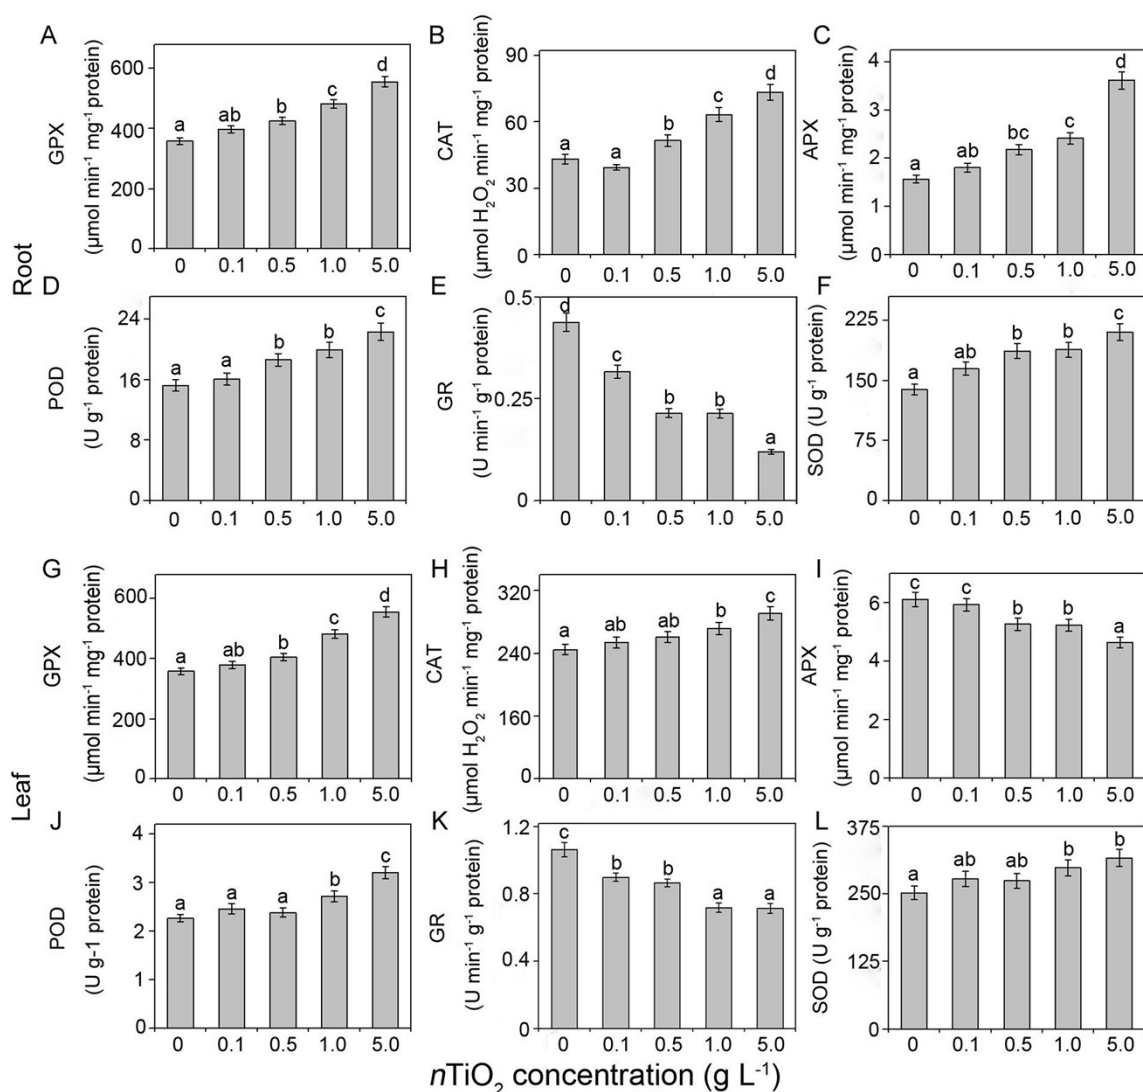

122

123 **Fig. S4** The activities of antioxidant enzymes in the roots (A-F) and leaves (G-L) of CN19

124 under  $n\text{TiO}_2$  exposure for 14 days. POD, peroxidase; SOD, superoxide dismutase; catalase

125 CAT, catalase; APX, ascorbate peroxidase; GPX, glutathione peroxidase; and GR,

126 glutathione reductase. The data are represented as mean  $\pm$  SD for four independent repetitions

127 ( $n = 4$ ). The Duncan's multiple range test showed that the values corresponding to the

128 different letters were significantly different at  $P < 0.05$ .

129

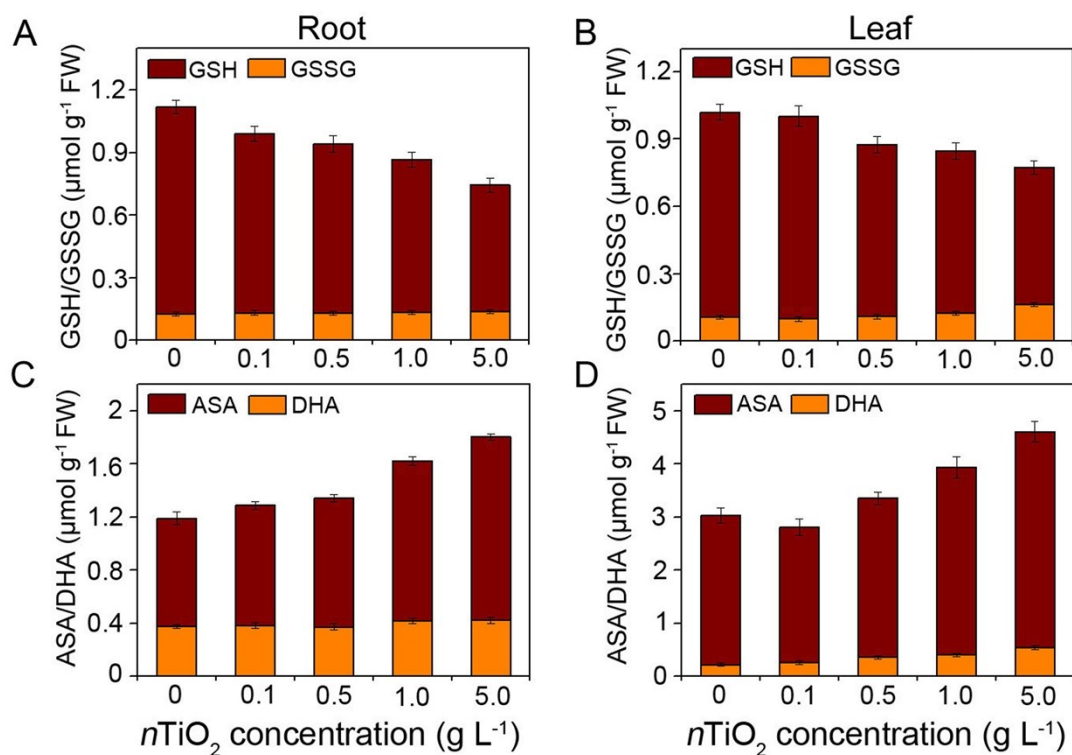

130

131 **Fig. S5** The content of non-enzyme antioxidant in the roots and leaves of CN19 under  $n\text{TiO}_2$

132 exposure for 14 days. AsA and DHA (A and C), reduced ascorbic acid and dehydroascorbate,

133 respectively; GSH and GSSG (B and D), reduced and oxidized glutathione, respectively. Data

134 is presented as mean  $\pm$  SD for four replicates. Values with a common letter are statistically

135 different at  $P < 0.05$  according to Duncan's multiple range test.

136

137

138

139

140

141

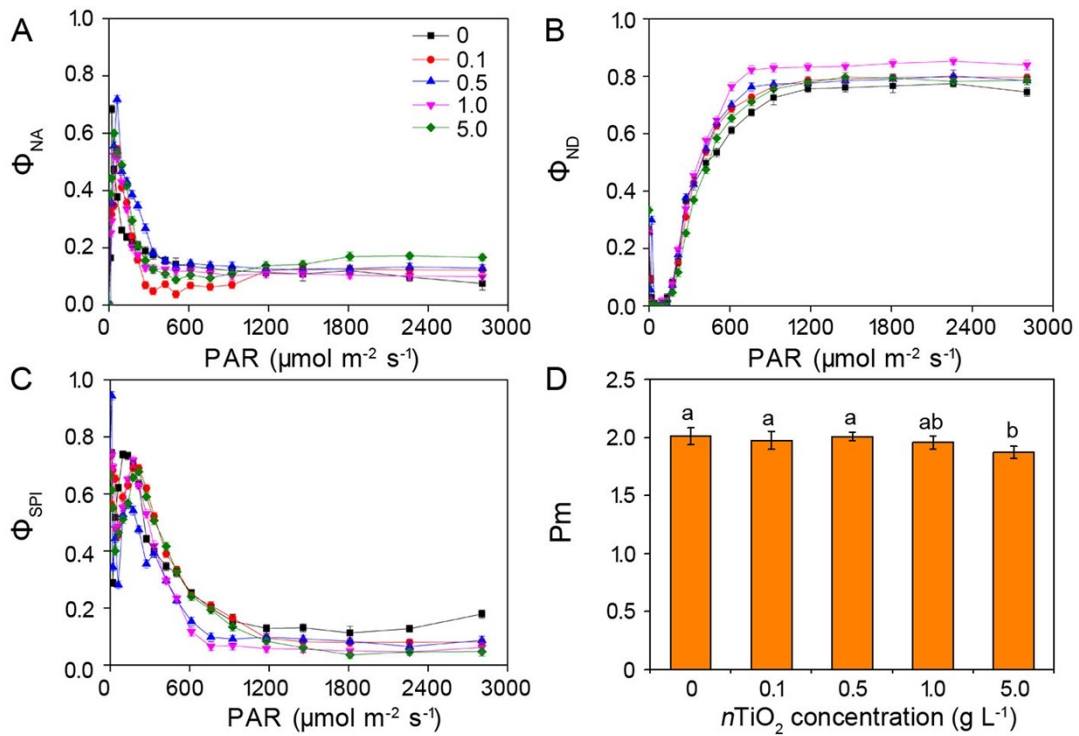

142

143 **Fig. S6** Parameters derived from P700 absorbance in CN19 under  $n\text{TiO}_2$  exposure for 14

144 days.  $\Phi_{\text{NA}}$  (A), acceptor side limitation of quantum yield at the PSI reaction center for non-

145 photochemical energy dissipation;  $\Phi_{\text{ND}}$  (B), donor side limitation of quantum yield at the PSI

146 reaction center for non-photochemical energy dissipation;  $\Phi_{\text{PSI}}$  (C), effective quantum yield

147 of PSI; Pm (D), maximal P700 signal. Data is presented as mean  $\pm$  SD for four replicates.

148 Values with a common letter are statistically different at  $P < 0.05$  according to Duncan's

149 multiple range test.

150

151

152

153

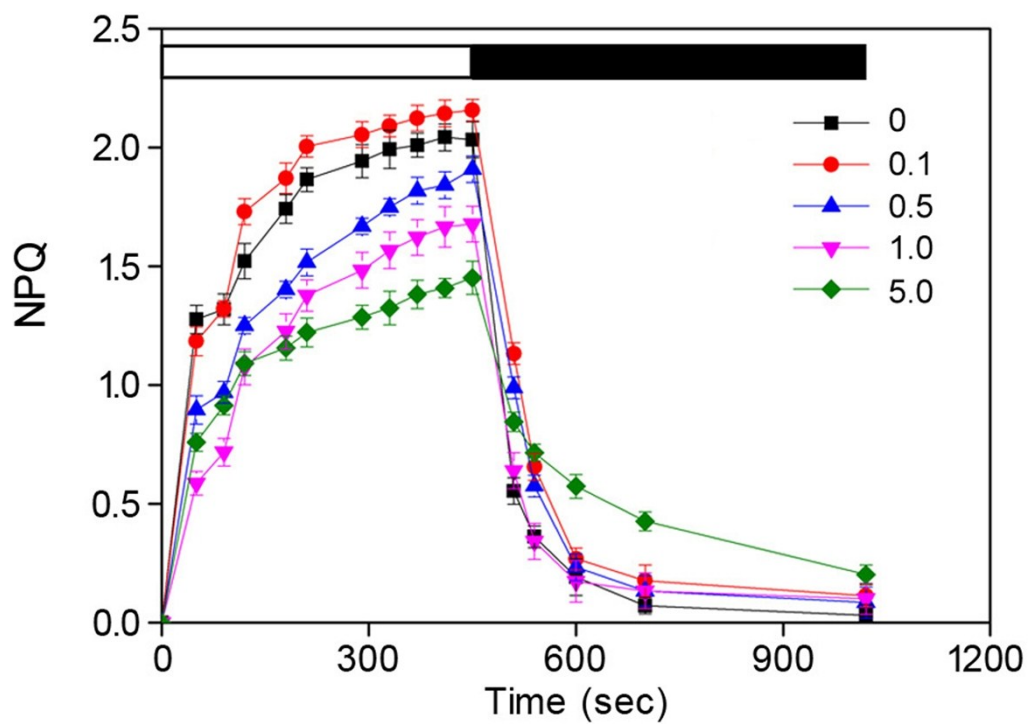

154

155 **Fig. S7** None-photochemical quenching (NPQ) kinetics of CN19 under  $n\text{TiO}_2$  exposure for 14  
 156 days. Wheat seedlings illuminated with  $1000 \mu\text{mol photons m}^{-2} \text{s}^{-1}$  for 10 min with a 15 min  
 157 period darkness, as indicated by the white and black bars. Data is represented as mean  $\pm$  SD  
 158 for four replicates.

159

160

161

162

163

164

165

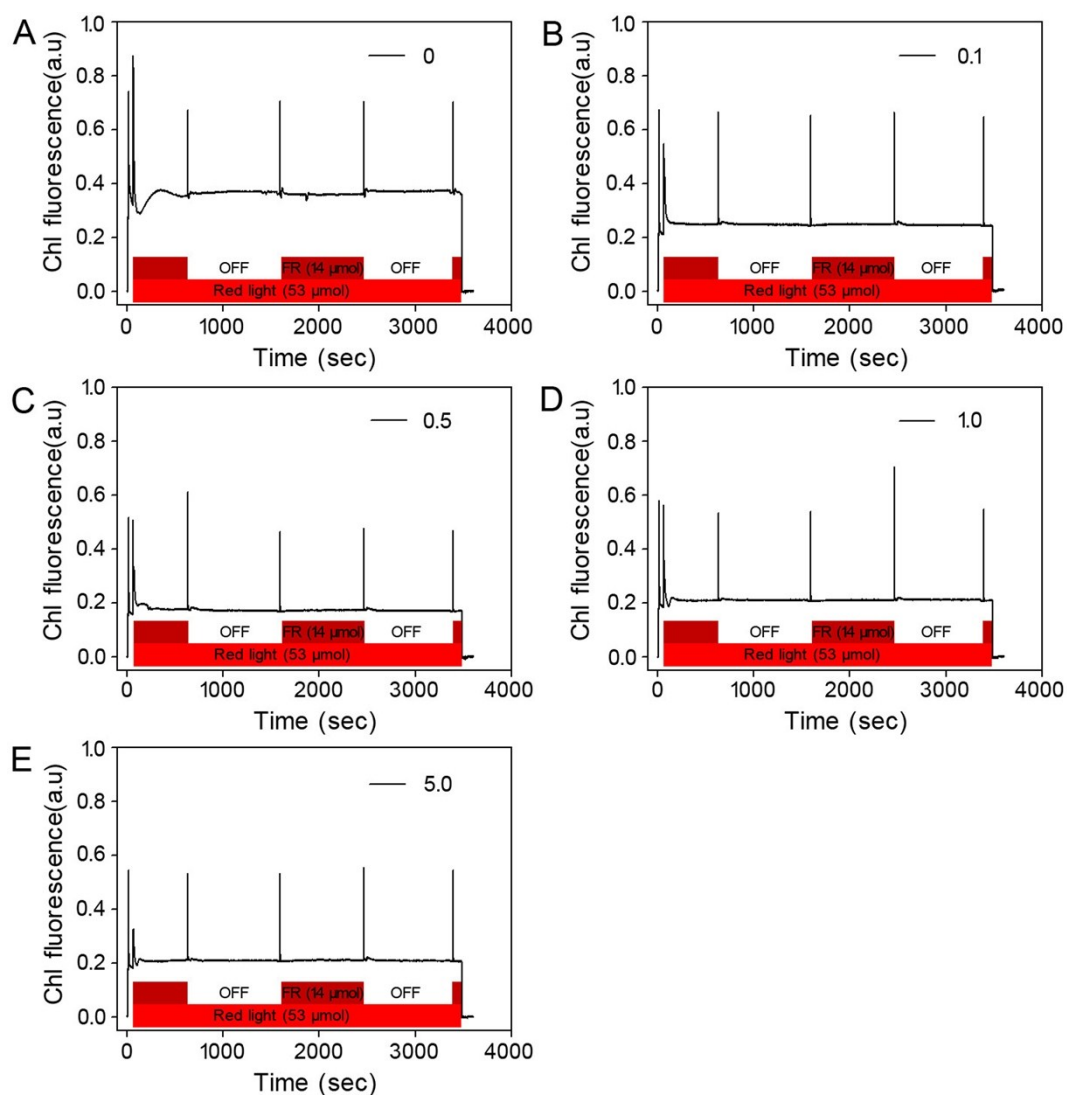

166

167 **Fig. S8** Assays of state transitions of CN19 under  $n\text{TiO}_2$  exposure for 14 days. Pulse  
 168 amplitude-modulated fluorescence traces after shifts from state 1 to state 2 light and back for  
 169 different treatments. The bars at the bottom indicate illumination with red (shown in red) and  
 170 far-red (dark red) light. Fluorescence is shown in arbitrary units.

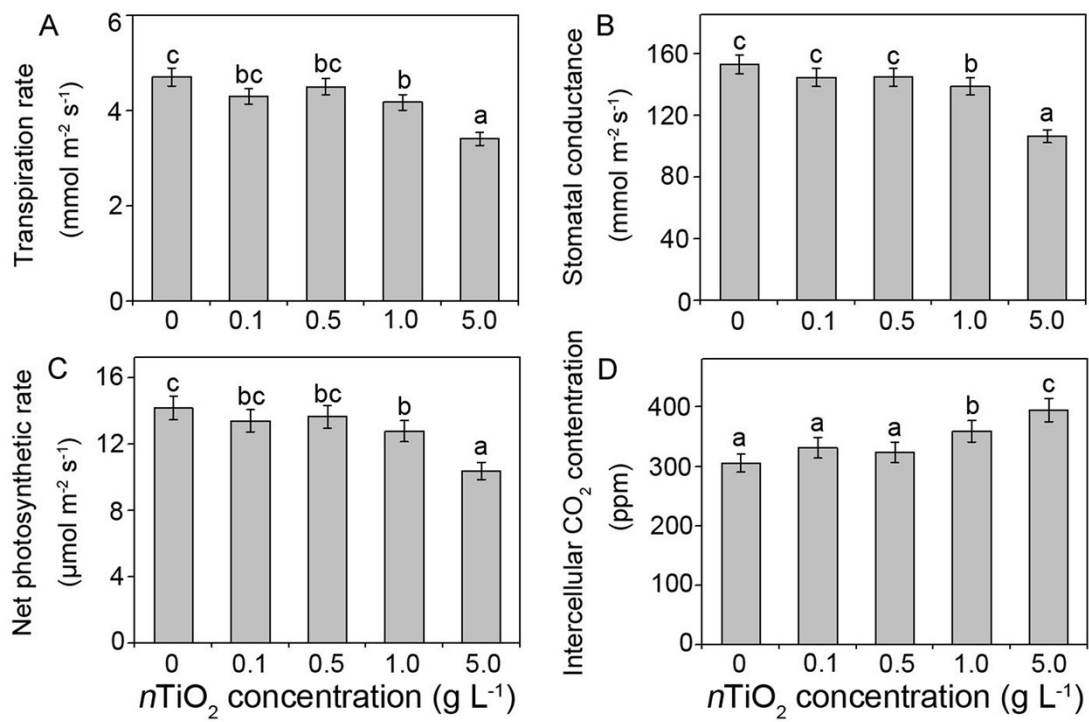

171

172 **Fig. S9** Transpiration rate (A), stomatal conductance (B), net photosynthetic rate (C),  
 173 intercellular CO<sub>2</sub> concentration (D) of CN19 under  $n\text{TiO}_2$  exposure for 14 days. Data is  
 174 presented as mean  $\pm$  SD for four replicates. Values with a common letter are statistically  
 175 different at  $P < 0.05$  according to Duncan's multiple range test.

176

177

178

179

180

181

182

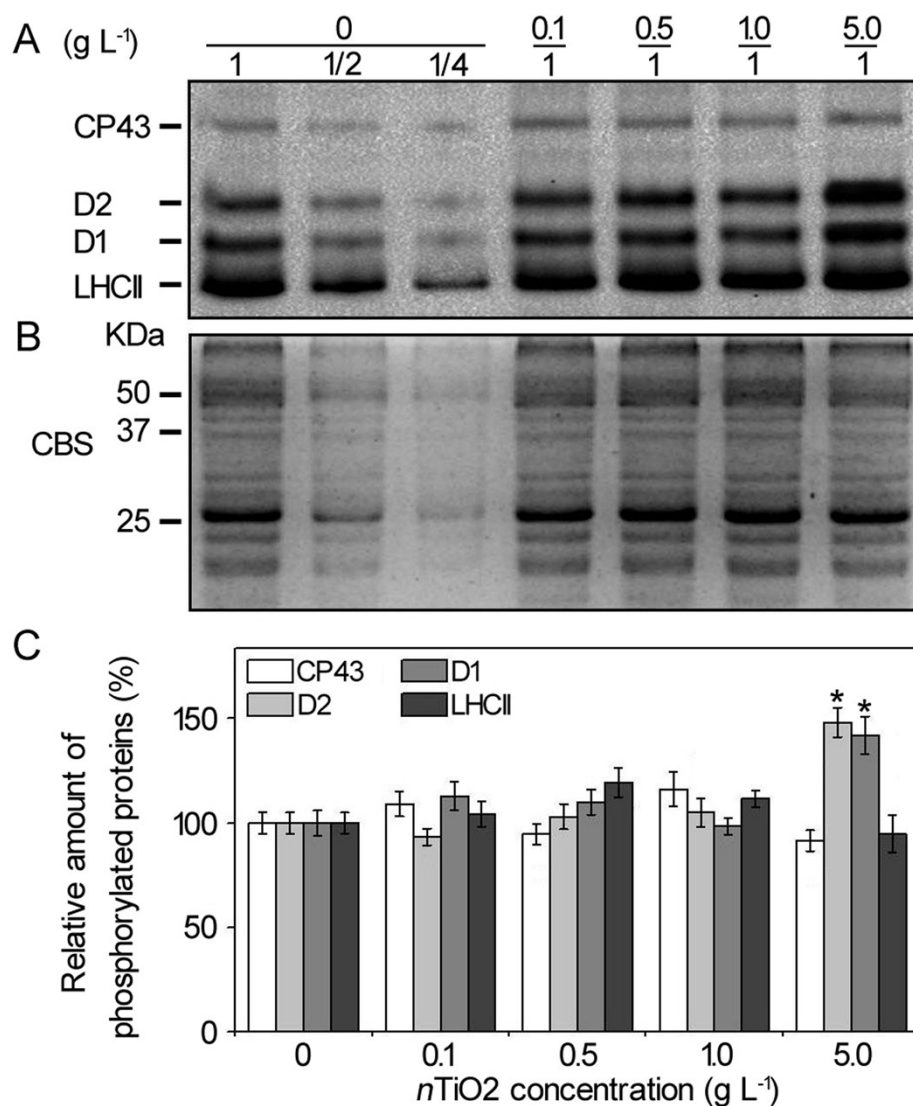

183

184 **Fig. S10** PSII protein phosphorylation of CN19 under  $n\text{TiO}_2$  exposure for 14 days. (A)

185 Immunoblot analyses of thylakoid membrane proteins were conducted using anti-

186 phosphothreonine antibodies. An equal amount of total Chl (1  $\mu\text{g}$  of Chl) was loaded into each

187 well. (B) Coomassie blue staining (CBS) of SDS-PAGE were showed. Loading was done

188 based on equal amount of total Chl (1  $\mu\text{g}$ ). (C) Quantitative analysis of immunoblot data. The

189 results are given relative to the content of control (100%). The significant differences were

190 marked with asterisks when  $P < 0.05$  ( $n = 4$ ).

191

192 **Supplemental References**

- 193 1 R. J. Porra, W. A. Thompson, and P. E. Kriedemann, *Biochim. Biophys. Acta*, 1989, **975**,  
194 384–394.
- 195 2 J. Thomas, *Percept. Psychophys*, 1977, **22**, 310–312.
- 196 3 L. S. Bates, R. P. Waldren, and I. D. Teare, *Plant Soil*, 1973, **39**, 205–207.
- 197 4 O. H. Lowry, N. J. Rosebrough, A. L. Farr and R. J. Randall, *J. Biol. Chem.*, 1951, **193**,  
198 265–275.
- 199 5 Y. E. Chen, J. Ma, N. Wu, Y. Q. Su, Z. W. Zhang, M. Yuan, H. Y. Zhang, X. Y. Zeng and  
200 S. Yuan, *Plant Physiol. Biochem.*, 2018, **130**, 267–276.
- 201 6 E. F. Elstner and A. Heupel, *Anal. Biochem.*, 1976, **70**, 616–620.
- 202 7 S. I. Okuda, K. Ito, H. Ozawa and K. Izaki, *J. Ferment. Bioeng.*, 1991, **71**, 424–429.
- 203 8 K. Shirasu, T. Lahaye, M. W. Tan, F. Zhou, C. Azevedo and P. Schulze-Lefert, *Cell*, 1999,  
204 **99**, 355–366.
- 205 9 Y. E. Chen, C. M. Zhang, Y. Q. Su, J. Ma, Z. W. Zhang, M. Yuan, H. Y. Zhang and S.  
206 Yuan, *Environ. Exp. Bot.*, 2017, **135**, 45–55.
- 207 10 J. Xu, Y. Y. Zhu, Q. Ge, Y. L. Li, J. H. Sun, Y. Zhang and X. J. Liu, *New Phytol.*, 2012,  
208 **196**, 125–138.
- 209 11 K. Kampfenkel, S. Kushnir, E. Babiychuk, D. Inze and M. Van Montagu, *J. Biol. Chem.*,  
210 1995, **270**, 28479–28486.
- 211 12 O. W. Griffith, *Anal. Biochem.*, 1980, **106**, 207–212.
- 212 13 S. Von Caemmerer and G. D. Farquhar, *Planta*, 1981, **153**, 376–387.
